# Supplementary material for: Unmet Need for Family Planning among Urban and Rural Married Women in Yangon Region, Myanmar—a Cross-Sectional Study
Source: MDPI journal article supplement (doi:10.3390/ijerph16193742), 2019-10-04
Supplement: s1 [file s1]

ERC Number: 010416  
Approval Number: Ethics/DMR/2016/117  
Date of Approval: 27 September, 2016 (valid up to 26 September, 2017)

Project Title: **Trends and Dynamics of Family Planning, Antenatal care, Delivery by skilled birth attendants and Fertility situation in Yangon Region, Myanmar**

Principal Investigator: Dr. Myint Myint Wai  
Department of Medical Services

Documents Accepted:

1. Ethical Proposal Form version 2.0 Dated 9 September, 2016
2. Full Proposal Protocol version 2.0 Dated 9 September, 2016
3. Proposal Summary version 2.0 Dated 9 September, 2016
4. Agreement to comply with ethical guideline version 2.0 Dated 9 September, 2016
5. Informed Consent Form (English & Myanmar) version 2.0 Dated 9 September, 2016
6. Questionnaires (English & Myanmar) version 2.0 Dated 9 September, 2016
7. Investigators' CV version 2.0 Dated 9 September, 2016

The Ethics Review Committee on Medical Research Involving Human Subjects, Department of Medical Research, Ministry of Health and Sports approves to conduct the proposed research project as it is in full compliance with the Declaration of Helsinki, Council for International Organizations of Medical Sciences guidelines and International Conference on Harmonisation in Good Clinical Practice guidelines.

**Prof. Pe Thet Khin**  
**Chairperson**  
**Ethics Review Committee**  
**Department of Medical Research**
